# Supplementary material
Source: Springer Nature journal article supplement (https://www.springermedizin.de/resource/supplementary/13002_2005_7_MOESM1_ESM.pdf/9626780)
Supplement: MOESM1 [file 9626780]

TABLE 2. MEDICAL USES OF SEVEN DIFFERENT PLANTS DESCRIBED BY THE HEALERS IN THE REGIONS OF DOILA, KOLOKANI AND SIBY; MALI.

| Plants                     | Indications | Preparation and use of the remedy                                                                                                                                                                                                                                                                                                                                                                                                                                                                                                                                  | Number of citations    | Total Number of citations | % related to each plant |
|----------------------------|-------------|--------------------------------------------------------------------------------------------------------------------------------------------------------------------------------------------------------------------------------------------------------------------------------------------------------------------------------------------------------------------------------------------------------------------------------------------------------------------------------------------------------------------------------------------------------------------|------------------------|---------------------------|-------------------------|
| <i>Opilia celtidifolia</i> | Dermatitis  | <p>- a decoction of leaves is used daily as bath for 2 days.</p> <p>- leaf decoction is used as bath and the powder as ointment on dermatitis lesions, use until healed.</p> <p>-An infusion of leaf powder is used as bath and drunk.</p> <p>- decoction of the leaves of <i>O. celtidifolia</i> and the stem bark of <i>Khaya senegalensis</i> is used as bath.</p> <p>- a macerate of the roots of <i>O. celtidifolia</i> is made with some water used for washing <i>Shorgum vulgare</i> seeds; drink one teacup of the macerate 3 times daily for 1 week.</p> | 20<br>1<br>1<br>1<br>1 | 24                        | 19.1                    |
|                            | Malaria     | <p>-drink the leaf decoction 1-2 times daily and use as a bath for 3 days; this remedy can induce diarrhoea; which antidote is a cold bath.</p> <p>-make a macerate of the roots of <i>O. celtidifolia</i> made with water used for washing the seeds of <i>Sorghum vulgare</i>, drink the macerate daily.</p>                                                                                                                                                                                                                                                     | 14<br>1                | 18                        | 14.4                    |

|  |                      |                                                                                                                                                                                                                                                                                                                                                                                                                                                                                                    |                              |    |      |
|--|----------------------|----------------------------------------------------------------------------------------------------------------------------------------------------------------------------------------------------------------------------------------------------------------------------------------------------------------------------------------------------------------------------------------------------------------------------------------------------------------------------------------------------|------------------------------|----|------|
|  | Neuralgic<br>Malaria | <p>- a decoct of the leaves of <i>O. celtidifolia</i> plus the leaves of <i>Trichilia emetica</i> is made and 1 teacup drunk 2 times every day until cured, the remedy can induce dizziness, nausea and vomiting, if so stop the treatment.</p> <p>-boil the leaves in water plus the juice of <i>Tamarindus indica</i> fruit; drink the filtrate until healed.</p> <p>-crush the leaves in water, use the filtrate as bath.</p>                                                                   | 1<br><br>1<br><br>1          |    |      |
|  | Abdominal pain       | <p>-drink the leaf decoction and use it as bath.</p> <p>-drink the root decoction in the morning and evening for 2 days. If diarrhoea occurs, the antidote is the powder of the fruit of <i>Piliostigma thonningii</i>.</p> <p>-add the leaf powder to porridge and eat; vomiting can arise for this treatment.</p> <p>-the 24h macerate of the root is drunk once daily for 2 days. This remedy can not be given to pregnant women.</p> <p>-mix the leaf powder with <i>Penesetum sp</i> seed</p> | 7<br><br>2<br><br>2<br><br>1 | 13 | 10.3 |

|  |                                |                                                                                                                                                                                                                                                                                                                                                                                                                                                                                             |                  |    |      |
|--|--------------------------------|---------------------------------------------------------------------------------------------------------------------------------------------------------------------------------------------------------------------------------------------------------------------------------------------------------------------------------------------------------------------------------------------------------------------------------------------------------------------------------------------|------------------|----|------|
|  |                                | powder, use the mixture for making porridge and eat. The remedy can induce vomiting.                                                                                                                                                                                                                                                                                                                                                                                                        | 1                |    |      |
|  | Appetizer                      | -the leaf decoction is drunk as appetizer<br>-mix the leaf powder in porridge and eat; or make an infusion with the powder and drink.<br>-make a decoction of the leaves added to the fruit of <i>T. indica</i> or add the powder of leaves to an infusion of <i>T. indica</i> fruit and drink; this treatment can induce diarrhoea                                                                                                                                                         | 10<br>2<br>1     | 13 | 10.3 |
|  | Taeniasis and intestinal worms | - drink the leaf decoction, moderate diarrhoea can be induced by the treatment.<br>-mix the leaf powder with <i>Penesetum sp</i> seed powder, eat the mixture on an empty stomach. The treatment can induce vomiting and diarrhoea, drink porridge against the vomiting and diarrhoea.<br>-drink the leaf powder infusion.<br>-drink the root decoction or the powder infusion in the morning with an empty stomach and do not eat until noon. The treatment can induce moderate diarrhoea. | 4<br>3<br>1<br>1 | 9  | 7.1  |
|  | Headaches                      | -use the leaf decoction as head steam bath and for washing.                                                                                                                                                                                                                                                                                                                                                                                                                                 | 2                | 6  | 4.8  |

|  |                 |                                                                                                                                                                                                                                                                                                                                                                                                                                                                                                    |                     |   |     |
|--|-----------------|----------------------------------------------------------------------------------------------------------------------------------------------------------------------------------------------------------------------------------------------------------------------------------------------------------------------------------------------------------------------------------------------------------------------------------------------------------------------------------------------------|---------------------|---|-----|
|  |                 | <ul style="list-style-type: none"> <li>-the leaf decoction is drunk, used as steam bath and head wash once everyday for 6 days.</li> <li>-mix the leaves with the root of <i>Ximenia americana</i>, drink the decoction and use as bath.</li> <li>-use the leaf powder for fumigation of the head.</li> </ul>                                                                                                                                                                                      | 2<br><br>1<br><br>1 |   |     |
|  | Tiredness       | <ul style="list-style-type: none"> <li>- the decoction of the leaves of <i>O. celtidifolia</i> and <i>Annona senegalensis</i> is used as a bath.</li> <li>- the leaf decoction is used as bath and drunk.</li> <li>- the leaves crushed in water is used as bath and drunk.</li> </ul>                                                                                                                                                                                                             | 2<br><br>1<br><br>1 | 4 | 3.2 |
|  | Sexual Asthenia | <ul style="list-style-type: none"> <li>-drink the leaves decoction until healed.</li> <li>-eat the leaf powder.</li> <li>-drink the decoction of the leaves of <i>O. celtidifolia</i> and the fruit of <i>Xylopi aethiopica</i> with sugar, in the evening.</li> <li>-t he leaves of <i>O. celtidifolia</i>, the <i>Lorantus sp</i> of <i>Khaya senegalensis</i> and the fruit of <i>Borassus aetiopum</i> are burnt and pound, the powder is mixed in the sauce and eaten until cured.</li> </ul> | 1<br>1<br>1<br>1    | 4 | 3.2 |
|  | Chest pain      | -the leaf decoction is used as a steam bath and as bath.                                                                                                                                                                                                                                                                                                                                                                                                                                           | 2                   | 3 | 2.4 |

|                  |  |                                                                                                                                                                                                                                                                                                                                                               |                     |   |     |
|------------------|--|---------------------------------------------------------------------------------------------------------------------------------------------------------------------------------------------------------------------------------------------------------------------------------------------------------------------------------------------------------------|---------------------|---|-----|
|                  |  | -the leaf powder is used for fumigation of the chest 2 times daily for 6 days.                                                                                                                                                                                                                                                                                | 1                   |   |     |
| Wound healing    |  | -wash the wound with the stem bark decoction of <i>Terminalia sp</i> and apply the fresh leaves crushed or the leaf powder of <i>O. celtidifolia</i> .<br>-apply the powder of the leaves of <i>O. celtidifolia</i> and <i>Guiera senegalensis</i> to the washed wound.<br>-apply the concentrated decoction of the leaves to the washed wound until healing. | 1<br><br>1<br><br>1 | 3 | 2.4 |
| Intoxications    |  | - a leaf decoction, is drunk and the filtrate used as bath one time daily for 3 to 4 days; in case of diarrhoea have a cold bath.<br>- a decoction with the leaves of <i>O. celtidifolia</i> and the roots of <i>Swartzia madagascariensis</i> is made and drunk until healed                                                                                 | 1<br><br>1          | 2 | 1.6 |
| Nightmare        |  | -the bark powder is used as ointment and fumigation at bed time.<br>- drink the leaf decoction.                                                                                                                                                                                                                                                               | 1<br><br>1          | 2 | 1.6 |
| Constipation     |  | -the root powder is mixed with curdled milk and drunk. 1 or 2 times are enough to cure constipation.<br>-drink the leaf decoction.                                                                                                                                                                                                                            | 1<br><br>1          | 2 | 1.6 |
| Urinary calculus |  | -the concentrated decoction of <i>O. celtidifolia</i> and <i>Tamarindus indica</i> leaves or fruit is drunk 2                                                                                                                                                                                                                                                 | 2                   | 2 | 1.6 |

|                             |  |                                                                                                                                                                                           |        |   |     |
|-----------------------------|--|-------------------------------------------------------------------------------------------------------------------------------------------------------------------------------------------|--------|---|-----|
|                             |  | times daily for 7 days.                                                                                                                                                                   |        |   |     |
| Dizziness                   |  | -drink the leaf decoction and use it as a bath.                                                                                                                                           | 2      | 2 | 1.6 |
| Child Paralysis             |  | -use the leaf decoction for washing and rubbing the feet until healed                                                                                                                     | 2      | 2 | 1.6 |
| Cataracts,<br>Eye infection |  | -use the decoction of the leaves of <i>O. celtidifolia</i> and <i>Tamarindus indica</i> for washing the eyes 2-3 times daily for 15 days.<br>-use the leaf decoction as eye wash.         | 1<br>1 | 2 | 1.6 |
| Gastric Ulcer               |  | -drink the leaf decoction and use it as bath.                                                                                                                                             | 2      | 2 | 1.6 |
| Jaundice                    |  | -drink a decoction of the leaves and use it as bath until cured.<br>-eat the powder of the leaves of <i>O. celtidifolia</i> and <i>Striga sp</i> in the morning and evening until healed. | 1<br>1 | 2 | 1.6 |
| Leprosy                     |  | -the leaf decoction is used in a bath with butter soap.                                                                                                                                   | 1      |   |     |
| Diarrhoea                   |  | -drink the leaf decoction and use it as bath.                                                                                                                                             | 1      |   |     |
| Genital infection           |  | -use the leaf decoction as enema until healed.                                                                                                                                            | 1      |   |     |
| Asthma                      |  | -the leaves of <i>Opilia</i> are mixed to the <i>loranthus</i> of <i>Manelikara multiverdis</i> , the decoction of both is drunk, used as bath and steam bath 2 times daily for 4 days.   | 1      |   |     |
| Bite of snake or dog        |  | -use the leaf decoction for washing and drink.                                                                                                                                            | 1      |   |     |
| Indigestion                 |  | -drink a root decoction in the evening.                                                                                                                                                   | 1      |   |     |

|                                                                                                        |                      |                                                                                                                                                                                             |   |   |      |
|--------------------------------------------------------------------------------------------------------|----------------------|---------------------------------------------------------------------------------------------------------------------------------------------------------------------------------------------|---|---|------|
|                                                                                                        | Thinness             | -the leaf decoction is used as bath and drunk.                                                                                                                                              | 1 |   |      |
|                                                                                                        | Cold                 | -the leaf decoction is used as steam bath of the head and the chest and is drunk.                                                                                                           | 1 |   |      |
|                                                                                                        | Amenorrhoea          | -the decoction of the leaves of <i>O. celtidifolia</i> the roots of <i>Cochlospermum tinctorium</i> and <i>Exalobus monopetalus</i> is drunk, this treatment can induce moderate diarrhoea. | 1 |   |      |
|                                                                                                        | Female Sterility     | -drink the root decoction, 1 glass every day until cured.                                                                                                                                   | 1 |   |      |
|                                                                                                        | Spontaneous abortion | -add the leaf powder to porridge and eat.                                                                                                                                                   | 1 |   |      |
| <i>Anthoceista djalonensis</i>                                                                         | Malaria              | -the maceration of root is drunk alone or with honey.                                                                                                                                       | 4 | 7 | 31.8 |
|                                                                                                        |                      | -the leaf decoction is drunk                                                                                                                                                                | 1 |   |      |
| - the root decoction added to honey is drunk.                                                          |                      | 1                                                                                                                                                                                           |   |   |      |
| -drink an infusion of the root powder.                                                                 |                      | 1                                                                                                                                                                                           |   |   |      |
|                                                                                                        | Abdominal Pain       | -the root of <i>A. djalonensis</i> , the stem bark and the leaves of <i>Lansonia inermis</i> are mixed, the 2 days macerate of these ingredients is drunk for 7 days.                       | 2 | 7 | 31.8 |
| -drink he root decoction, this remedy can induce diarrhoea which can be cured by porridge consumption. |                      | 2                                                                                                                                                                                           |   |   |      |
| -mix the roots powder into the porridge and eat; or drink a salty root powder infusion.                |                      | 2                                                                                                                                                                                           |   |   |      |
|                                                                                                        |                      | -drink one teacup of the 24 h macerate of the                                                                                                                                               |   |   |      |

|                               |                    |                                                                                                                                                   |   |   |      |
|-------------------------------|--------------------|---------------------------------------------------------------------------------------------------------------------------------------------------|---|---|------|
|                               |                    | roots of <i>A. djalonenensis</i> and <i>Swartzia madagascariensis</i> plus honey every day until healed.                                          | 1 |   |      |
|                               | Intoxication       | -drink some milk to which leaf powder is added.                                                                                                   | 1 |   |      |
|                               | Amenorrhoea        | -the powder of stem and root bark plus salt is eaten, or the decoction of both is drunk.                                                          | 1 |   |      |
|                               | Sexual Asthenia    | -the powder of stem or root bark plus salt is added to porridge or sauce and eaten.                                                               | 1 |   |      |
|                               | Teniasis           | -make a decoction of roots, add honey and leave it for 7 days of maceration. -drink one glass two times daily, this remedy can induce diarrhoea.  | 1 |   |      |
|                               | Fever              | the decoction of leaves is drunk and used as bath.                                                                                                | 1 |   |      |
|                               | Jaundice           | -drink one teacup of the macerate of the roots of <i>A. djalonenensis</i> and <i>Swartzia madagascariensis</i> with honey every day until healed. | 1 |   |      |
|                               | Haemorrhage        | -the leaf decoction is used as steam bath and a bath.                                                                                             | 1 |   |      |
|                               | Pregnancy Vomiting | -drink the leaf decoction 3 times daily until healed.                                                                                             | 1 |   |      |
| <i>Erythrina senegalensis</i> | Amenorrhoea        | -drink the leaf and flower decoction and use as bath.                                                                                             | 2 | 3 | 27.3 |
|                               |                    | -drink and use the root decoction as enema to cure menstrual disorders in women                                                                   | 1 |   |      |
|                               | Sexual Asthenia    | -eat the salty root powder until healed.                                                                                                          | 1 | 2 | 182  |
|                               |                    | -chew the fresh branch and use as tooth brush to                                                                                                  | 1 |   |      |



|                             |                                                                      |                                                                                                                                                                  |   |   |      |
|-----------------------------|----------------------------------------------------------------------|------------------------------------------------------------------------------------------------------------------------------------------------------------------|---|---|------|
| <i>Heliotropium indicum</i> |                                                                      | cure sexual impotency.                                                                                                                                           |   |   |      |
|                             | Urinary Bilharzias                                                   | -drink a decoction of stem bark.                                                                                                                                 | 2 | 2 | 18.2 |
|                             | Children dentition                                                   | -the leaf decoction is used as bath and given orally to children to cure diseases related to teething.                                                           | 1 |   |      |
|                             | Malaria                                                              | -the leaf or root decoction is drunk and used as bath for 3 days.                                                                                                | 1 |   |      |
|                             | Infertility                                                          | -drink root decoction one time daily for 20 days.                                                                                                                | 1 |   |      |
|                             | Dizziness                                                            | -leaf decoction is drunk and used as bath                                                                                                                        | 1 |   |      |
|                             | Vomiting                                                             | -the leaf decoction can be drunk instead of the root decoction.<br>- the root decoction is drunk for 1-2 days<br>-drink the flower decoction.                    | 2 | 4 | 40   |
|                             |                                                                      |                                                                                                                                                                  | 1 |   |      |
|                             |                                                                      |                                                                                                                                                                  | 1 |   |      |
|                             | Amenorrhoea                                                          | -the root decoction is used as bath and drunk 3 days.<br>-the decoction of the leaves and the stem bark of <i>Parkia biglobosa</i> is drunk at night for 7 days. | 1 | 2 | 20   |
|                             |                                                                      |                                                                                                                                                                  | 1 |   |      |
|                             | Malaria                                                              | -the leaf decoction is drunk.                                                                                                                                    | 1 |   |      |
| High Blood-Pressure         | -drink the leaf decoction.                                           | 1                                                                                                                                                                |   |   |      |
| Baby Thinness               | -drink the leaf decoction and use as bath 4 times daily for 10 days. | 1                                                                                                                                                                |   |   |      |

|                          |                   |                                                                                                                                                                                                                                                                                                                                                                                                                                                                                                                                                                                                                                                                                                                                                                                                                                                                                        |                                                                 |    |      |
|--------------------------|-------------------|----------------------------------------------------------------------------------------------------------------------------------------------------------------------------------------------------------------------------------------------------------------------------------------------------------------------------------------------------------------------------------------------------------------------------------------------------------------------------------------------------------------------------------------------------------------------------------------------------------------------------------------------------------------------------------------------------------------------------------------------------------------------------------------------------------------------------------------------------------------------------------------|-----------------------------------------------------------------|----|------|
|                          | Ocular infections | -use the leaf decoction for washing the eyes.                                                                                                                                                                                                                                                                                                                                                                                                                                                                                                                                                                                                                                                                                                                                                                                                                                          | 1                                                               |    |      |
| <i>Trichilia emetica</i> | Malaria           | <p>-use the leaf decoction as bath and drink for 3-7 days; the decoction can induce dizziness when administrated in the morning on an empty stomach, also vomiting and diarrhoea. Drink lemon juice against the dizziness.</p> <p>-drink the stem bark decoction with honey and use as bath until healed.</p> <p>-drink the root decoction and used as a bath, sugar can be added to the decoction for drinking to make it more tasteful.</p> <p>-drink the root powder infusion.</p> <p>-the root is macerated for 7 days, the macerate is drunk for 3 days, or the root is macerated for 3 days with honey and drunk until healed.</p> <p>-drink an infusion of powdered stem bark and leaves.</p> <p>-drink the leaf and root decoction 2-3 times daily for 3 days.</p> <p>-the 10 days macerate of the root from <i>T. emetica</i>, <i>Pseudocedra kotschii</i>, <i>Cassia</i></p> | <p>18</p> <p>3</p> <p>2</p> <p>2</p> <p>2</p> <p>1</p> <p>1</p> | 32 | 24.2 |

|                |                                                                                                                                                                                                                                                                                                                                                                                                                                                                                                                                                                                                                                            |   |    |      |
|----------------|--------------------------------------------------------------------------------------------------------------------------------------------------------------------------------------------------------------------------------------------------------------------------------------------------------------------------------------------------------------------------------------------------------------------------------------------------------------------------------------------------------------------------------------------------------------------------------------------------------------------------------------------|---|----|------|
|                | <p><i>sieberiana</i>, <i>Nauclea latifolia</i> mixed with honey is drunk for 10 days.</p> <p>- a 3-4 hours decoction of ~ 5 Kg of dried stem bark plus the juice of 100 lemons and 10 litres of water is drunk, 1 teacup everyday until healed.</p> <p>-drink the decoction of <i>T emetica</i> and <i>Mitragyna inermis</i> stem bark 3 times every day until healed.</p>                                                                                                                                                                                                                                                                 | 1 |    |      |
| Abdominal pain | <p>-drink an infusion or decoction of the root or the leaf powder.</p> <p>-drink a leaf decoction and use it as bath.</p> <p>-drink an infusion of root powder mixed with salt in morning and evening.</p> <p>-drink the stem bark decoction or the powder infusion and use as bath until healed. Moderate diarrhoea can occur during the treatment.</p> <p>-the root bark is crushed and dried with lemon, the powder infusion is drunk.</p> <p>- drink the decoction of the root of <i>T. emetica</i> and those of <i>Tamarindus indica</i> the morning and evening until healed; moderate diarrhoea can arise during the treatment.</p> | 9 | 25 | 18.9 |
|                |                                                                                                                                                                                                                                                                                                                                                                                                                                                                                                                                                                                                                                            | 6 |    |      |
|                |                                                                                                                                                                                                                                                                                                                                                                                                                                                                                                                                                                                                                                            | 3 |    |      |
|                |                                                                                                                                                                                                                                                                                                                                                                                                                                                                                                                                                                                                                                            | 3 |    |      |
|                |                                                                                                                                                                                                                                                                                                                                                                                                                                                                                                                                                                                                                                            | 1 |    |      |
|                |                                                                                                                                                                                                                                                                                                                                                                                                                                                                                                                                                                                                                                            | 1 |    |      |

|  |             |                                                                                                                                                                                                                                                                                                                                                                                                                                                                                                                           |   |    |     |
|--|-------------|---------------------------------------------------------------------------------------------------------------------------------------------------------------------------------------------------------------------------------------------------------------------------------------------------------------------------------------------------------------------------------------------------------------------------------------------------------------------------------------------------------------------------|---|----|-----|
|  |             | <p>-drink a macerate of <i>T. emetica</i> root and <i>Prosopis africana</i> stem bark, 1 teacup daily for 5 days, in case of diarrhoea have a cold bath.</p> <p>- drink the root macerate with honey for 5 days.</p> <p>The overdose of the remedy can induce diarrhoea.</p>                                                                                                                                                                                                                                              | 1 |    |     |
|  |             |                                                                                                                                                                                                                                                                                                                                                                                                                                                                                                                           | 1 |    |     |
|  | Dermatitis  | <p>-use the leaf decoction as steam bath, as bath and drink.</p> <p>-apply the leaf powder on dermatitis lesions and use it for fumigation, or use the powder infusion for washing the lesions.</p> <p>-apply the powder from the bark or the root burnt to a cinder on the lesion washed with the bark decoction.</p>                                                                                                                                                                                                    | 6 | 10 | 7.6 |
|  |             |                                                                                                                                                                                                                                                                                                                                                                                                                                                                                                                           | 2 |    |     |
|  |             |                                                                                                                                                                                                                                                                                                                                                                                                                                                                                                                           | 2 |    |     |
|  | Haemorrhoid | <p>-the root bark is crushed and dried with black pepper ginger, and the fruit of <i>Xylopi aethiopica</i>, infusion of the powder is drunk every day until healed. Diarrhoea and vomiting can arise during the treatment, if so drink a decoction of <i>Strychnos spinosa</i> stem bark against this.</p> <p>-the root powder macerate in salt water is used as enema, or drink the root decoction.</p> <p>-use a macerate of root powder of <i>T. emetica</i> and <i>Securidaca longepedunculata</i> as enema for 3</p> | 3 | 8  | 6.1 |
|  |             |                                                                                                                                                                                                                                                                                                                                                                                                                                                                                                                           | 2 |    |     |

|               |                                                                                                                                                                                                                                                                                                                                                             |                  |   |     |
|---------------|-------------------------------------------------------------------------------------------------------------------------------------------------------------------------------------------------------------------------------------------------------------------------------------------------------------------------------------------------------------|------------------|---|-----|
|               | <p>days. The remedy will induce diarrhoea which is its good effect.</p> <p>-crush and dry the root bark of <i>Temetica</i> and <i>Pseudocedrela kotschii</i>, use the infusion of the powder as enema.</p> <p>-drink the infusion of root powder or the decoction of the root 3 times daily before eating.</p>                                              | 1                |   |     |
|               |                                                                                                                                                                                                                                                                                                                                                             | 1                |   |     |
| Jaundice      | <p>-drink a leaf decoction for 7 days.</p> <p>-drink a concentrated decoction of root; or a root powder infusion until healed.</p> <p>-crush the root, add 2 litres of honey and 4 litres of water used for washing <i>Sorghum vulgare</i> seeds, macerate for 24 h and drink 3 times daily until healed.</p> <p>-drink the root decoction for 15 days.</p> | 3<br>2<br>1<br>1 | 7 | 5.3 |
| Chest pain    | -drink the leaf decoction and use it as a bath, a steam bath and make chest massage with the decocted leaves.                                                                                                                                                                                                                                               | 7                | 7 | 5.3 |
| Gastric ulcer | -crush the root bark with salt and ginger, consume the powder in porridge 2 times every day until healed, or take an infusion of the powder.                                                                                                                                                                                                                | 2                | 4 | 3   |

|  |                     |                                                                                                                                                                                                                                                                                                                                                                                                                     |                  |   |     |
|--|---------------------|---------------------------------------------------------------------------------------------------------------------------------------------------------------------------------------------------------------------------------------------------------------------------------------------------------------------------------------------------------------------------------------------------------------------|------------------|---|-----|
|  |                     | -drink an infusion of root powder until healed or consume the powder into porridge for 1 month.                                                                                                                                                                                                                                                                                                                     | 2                |   |     |
|  | Digestive infection | -mix the salty root powder to sauce, coffee or porridge and consume.<br>-drink the 3 days root maceration for 1 month.<br>-drink a leaf decoction; it can induce moderated vomiting and diarrhoea.<br>-make a decoction of the root of <i>Temetica</i> and the root of <i>Cassia sieberiana</i> , macerate the filtrate with honey for 5 days, and drink one teacup every morning on an empty stomach until healed. | 1<br>1<br>1<br>1 | 4 | 3   |
|  | Female Sterility    | -drink the leaf decoction of <i>T. emetica</i> and <i>Combretum molle</i> to induce fertility and conceiving.<br>- consume the root powder added to ginger and salt in porridge to cure female sterility and its related stomach pain.<br>-drink the root and seed decoction to induce fertility.<br>- drink the leaf powder infusion made by milk.                                                                 | 1<br>1<br>1<br>1 | 4 | 3   |
|  | Headache            | -drink the leaf decoction and use as head wash.<br>-use the leaf powder for fumigation.                                                                                                                                                                                                                                                                                                                             | 3<br>1           | 4 | 3   |
|  | Thinness            | use the decoction of leaves as bath and drink                                                                                                                                                                                                                                                                                                                                                                       | 3                | 3 | 2.3 |

|  |                               |                                                                                                                                                                                                                                                                     |        |   |     |
|--|-------------------------------|---------------------------------------------------------------------------------------------------------------------------------------------------------------------------------------------------------------------------------------------------------------------|--------|---|-----|
|  |                               | alone or with sugar added.                                                                                                                                                                                                                                          |        |   |     |
|  | Intoxication                  | -drink a macerate of root powder in milk, this remedy can induce diarrhoea and vomiting, if so take a cold bath to stop these symptoms or consume some porridge.                                                                                                    | 3      | 3 | 2.3 |
|  | Tiredness                     | -use a leaf decoction as bath.<br>-Use the root powder as ointment and as a body massage.                                                                                                                                                                           | 2<br>1 | 3 | 2.3 |
|  | Leprosy                       | -drink the root decoction and use it as bath.<br>-drink the leaf decoction and use as bath until healed.                                                                                                                                                            | 1<br>1 | 2 | 1.5 |
|  | Urinary infection, bilharzias | -drink the decoction of the leaves and the fruits of <i>Sticnos spinosa</i> until healed.<br>-drink a root powder infusion.                                                                                                                                         | 1<br>1 | 2 | 1.5 |
|  | Dysmenorrhoea                 | -use the leaf decoction of <i>Lorantus sp</i> from <i>Vitex doniani</i> and <i>T. emetica</i> as enema to stop bleeding after delivery.<br>-drink a decoction of the leaves of <i>T. emetica</i> and <i>Tamarindus indica</i> or <i>Citrus limonene</i> for 7 days. | 1<br>1 | 2 | 1.5 |
|  | Constipation                  | -drink a leaf or a stem bark decoction for 3 days.<br>-drink the 7 days root macerate for 3 days.                                                                                                                                                                   | 1<br>1 | 2 | 1.5 |
|  | Abdominal flatulence          | -drink the leaf decocts of <i>T. emetica</i> and <i>Opilia celtidifolia</i> .<br>-drink an infusion of <i>Acacia nilotica</i> seed powder                                                                                                                           | 1<br>1 | 2 | 1.5 |

|                               |               |                                                                                                                                                                                                                                                             |             |    |     |
|-------------------------------|---------------|-------------------------------------------------------------------------------------------------------------------------------------------------------------------------------------------------------------------------------------------------------------|-------------|----|-----|
|                               |               | mixed to <i>T. emetica</i> root powder.                                                                                                                                                                                                                     |             |    |     |
|                               | Ensorcelled   | -use the leaf decoction as bath and drink.<br>-Use the root maceration as bath and drink.                                                                                                                                                                   | 1<br>1      | 2  | 1.5 |
|                               | Teniasis      | -crush and dry the stem bark with the root of <i>Securidaca longepedunculata</i> , drink the macerate of the powder once daily for 1-3 days. Diarrhoea and vomiting can arise during the treatment.                                                         | 1           |    |     |
|                               | Pneumonia     | -drink and use as bath the leaf or root decoction for 12 days.                                                                                                                                                                                              | 1           |    |     |
|                               | Swelling      | -apply the root powder mixed with potassium hydroxide dissolved in little water.                                                                                                                                                                            | 1           |    |     |
|                               | Eye infection | -use the leaf and stem bark decoction as eye wash 2 times every day.                                                                                                                                                                                        | 1           |    |     |
|                               | Cough         | -drink a leaf decoction.                                                                                                                                                                                                                                    | 1           |    |     |
|                               | Breast pain   | -use the leaf decoction as breast steam bath.                                                                                                                                                                                                               | 1           |    |     |
| <i>Piliostigma thonningii</i> | Malaria       | - drink and use as bath the leaf decoction.<br>-drink and use as bath the leaf powder macerate.<br>-use a decoction of <i>P. thonningii</i> and <i>Guiera senegalensis</i> leaves as bath and drink.<br>-the stem bark decoction is drunk and used as bath. | 7<br>1<br>1 | 10 | 40  |



|                                 |                      |                                                                                                                                                                                                  |             |    |      |
|---------------------------------|----------------------|--------------------------------------------------------------------------------------------------------------------------------------------------------------------------------------------------|-------------|----|------|
|                                 |                      |                                                                                                                                                                                                  | 1           |    |      |
|                                 | Abdominal flatulence | -drink the leaf decoction.                                                                                                                                                                       | 4           | 4  | 16   |
|                                 | Malnutrition         | -drink a leaf decoction.                                                                                                                                                                         | 2           | 2  | 8    |
|                                 | Dysentery            | -consume the powder of the fruit mixed with salt.                                                                                                                                                | 1           |    |      |
|                                 | Arthritis            | use the powder of the fruit as ointment on joints.                                                                                                                                               | 1           |    |      |
|                                 | Headache             | -use the dried fruit for fumigation of the head.                                                                                                                                                 | 1           |    |      |
|                                 | Cough                | -drink an infusion of the mixture of the stem bark powder from <i>P. thonningii</i> and <i>Anogeus leiocarpus</i> .                                                                              | 1           |    |      |
|                                 | Wound healing        | -use the root decoction for washing the wound and apply the powder of the root burnt to a cinder.                                                                                                | 1           |    |      |
|                                 | Haemorrhoid          | -consume the powder of the fruit mixed with salt.                                                                                                                                                | 1           |    |      |
|                                 | Jaundice             | -use a leaf decoction as bath and drink.                                                                                                                                                         | 1           |    |      |
|                                 | Backache             | -use the leaf decoction as bath.                                                                                                                                                                 | 1           |    |      |
|                                 | Thinness             | -consume the leaf powder in food.                                                                                                                                                                | 1           |    |      |
| <i>Cochlospermum tinctorium</i> | Jaundice             | -drink an infusion of root powder.<br>-consume the root powder in porridge.<br>-use the root macerate as bath and drink 7 times the same day or drink the root macerate with honey until healed. | 4<br>3<br>3 | 14 | 42.4 |

|  |                |                                                                                                                         |   |   |      |
|--|----------------|-------------------------------------------------------------------------------------------------------------------------|---|---|------|
|  |                | -boil eggs in the root decoction, use the decoction as bath and consume the eggs; the remedy can induce vomiting.       | 1 |   |      |
|  |                | -use the root decoction for coking sauce or meat and eat.                                                               | 1 |   |      |
|  |                | --drink the root powder dissolved in the juice of <i>Tamarindus indica</i> fruit.                                       | 1 |   |      |
|  |                | -drink an infusion of leaf powder added to honey at morning and evening for 7 days.                                     | 1 |   |      |
|  | Malaria        | --drink an infusion of the root powder or consume the root powder in porridge.                                          | 7 | 9 | 27.3 |
|  |                | -use the leaf decoction for cooking sorghum which is used as meal.                                                      | 1 |   |      |
|  |                | -drink the decoction of the root of <i>C. tinctorium</i> and <i>Swartzia madagascariensis</i> 2 times daily for 5 days. | 1 |   |      |
|  | Abdominal Pain | -consume eggs containing the root powder, or drink a root powder infusion 3 times every day until healed.               | 1 | 2 | 6.1  |
|  |                | -drink an infusion of root powder in the morning on an empty stomach.                                                   | 1 |   |      |
|  | Haemorrhoid    | -consume sauce or porridge cooked with the root decoction 2 times weekly in 2 weeks.                                    | 1 |   |      |
|  | Bilharzias     | -consume porridge containing the root powder 2 times daily for 2 days.                                                  | 1 |   |      |
|  | Hepatitis      | -consume the root powder mixed with onion and                                                                           | 1 |   |      |

|  |                                    |                                                                                                                                                                 |   |  |  |
|--|------------------------------------|-----------------------------------------------------------------------------------------------------------------------------------------------------------------|---|--|--|
|  |                                    | garlic in porridge.                                                                                                                                             |   |  |  |
|  | Teniasis and other intestinal worm | -make an infusion with the powder of the root crushed and dried with salt and the fruit of <i>Xylopi aethiopica</i> , drink in the morning on an empty stomach. | 1 |  |  |
|  | Snake bite                         | -the root macerate induces vomiting which eliminate snake poison.                                                                                               | 1 |  |  |
|  | Dysmenorrhoea                      | -drink the 24 hours root powder macerate.                                                                                                                       | 1 |  |  |
|  | Wound                              | -apply the root powder on the wound.                                                                                                                            | 1 |  |  |
|  | Pneumonia                          | -drink an infusion of root powder.                                                                                                                              | 1 |  |  |

The values of the percentage for the remedies reported only once are not given.
